# Supplementary material
Source: publisher figshare collection journal article supplement (https://acs.figshare.com/ndownloader/files/3718795)
Supplement: Supplementary file 1 [file 3718795]

 
data_20150722szzy_0m 
 
_audit_creation_method            SHELXL-97 
_chemical_name_systematic 
; 
 ? 
; 
_chemical_name_common             ? 
_chemical_melting_point           ? 
_chemical_formula_moiety          ? 
_chemical_formula_sum 
 'C22 H27 F N O P' 
_chemical_formula_weight          371.42 
 
loop_ 
 _atom_type_symbol 
 _atom_type_description 
 _atom_type_scat_dispersion_real 
 _atom_type_scat_dispersion_imag 
 _atom_type_scat_source 
 'C'  'C'   0.0033   0.0016 
 'International Tables Vol C Tables 4.2.6.8 and 6.1.1.4' 
 'H'  'H'   0.0000   0.0000 
 'International Tables Vol C Tables 4.2.6.8 and 6.1.1.4' 
 'N'  'N'   0.0061   0.0033 
 'International Tables Vol C Tables 4.2.6.8 and 6.1.1.4' 
 'O'  'O'   0.0106   0.0060 
 'International Tables Vol C Tables 4.2.6.8 and 6.1.1.4' 
 'P'  'P'   0.1023   0.0942 
 'International Tables Vol C Tables 4.2.6.8 and 6.1.1.4' 
 'F'  'F'   0.0171   0.0103 
 'International Tables Vol C Tables 4.2.6.8 and 6.1.1.4' 
 
_symmetry_cell_setting           'Monoclinic'
_symmetry_space_group_name_H-M   'P2(1)/n  '
 
loop_ 
 _symmetry_equiv_pos_as_xyz 
 'x, y, z' 
 '-x+1/2, y+1/2, -z+1/2' 
 '-x, -y, -z' 
 'x-1/2, -y-1/2, z-1/2' 
 
_cell_length_a                    7.771(4) 
_cell_length_b                    19.100(10) 
_cell_length_c                    14.003(7) 
_cell_angle_alpha                 90.00 
_cell_angle_beta                  102.865(9) 
_cell_angle_gamma                 90.00 
_cell_volume                      2026.2(19) 
_cell_formula_units_Z             4 
_cell_measurement_temperature     296(2) 
_cell_measurement_reflns_used    2887
_cell_measurement_theta_min        2.60
_cell_measurement_theta_max       24.13
 
_exptl_crystal_description        'block' 
_exptl_crystal_colour             'colorless' 
_exptl_crystal_size_max           0.28 
_exptl_crystal_size_mid           0.25 
_exptl_crystal_size_min           0.22 
_exptl_crystal_density_meas       ? 
_exptl_crystal_density_diffrn     1.218 
_exptl_crystal_density_method     'not measured' 
_exptl_crystal_F_000              792 
_exptl_absorpt_coefficient_mu     0.155 
_exptl_absorpt_correction_type    'multi-scan' 
_exptl_absorpt_correction_T_min   0.9580 
_exptl_absorpt_correction_T_max   0.9668 
_exptl_absorpt_process_details    'sadabs' 
 
_exptl_special_details 
; 
 ? 
; 
 
_diffrn_ambient_temperature       296(2) 
_diffrn_radiation_wavelength      0.71073 
_diffrn_radiation_type            MoK\a 
_diffrn_radiation_source          'fine-focus sealed tube' 
_diffrn_radiation_monochromator   graphite 
_diffrn_measurement_device_type  'Bruker APEX-II CCD'
_diffrn_measurement_method       '\f and \w scans'
_diffrn_detector_area_resol_mean  ? 
_diffrn_standards_number          ? 
_diffrn_standards_interval_count  ? 
_diffrn_standards_interval_time   ? 
_diffrn_standards_decay_%         ? 
_diffrn_reflns_number             11042 
_diffrn_reflns_av_R_equivalents   0.0316 
_diffrn_reflns_av_sigmaI/netI     0.0351 
_diffrn_reflns_limit_h_min        -9 
_diffrn_reflns_limit_h_max        8 
_diffrn_reflns_limit_k_min        -22 
_diffrn_reflns_limit_k_max        17 
_diffrn_reflns_limit_l_min        -16 
_diffrn_reflns_limit_l_max        15 
_diffrn_reflns_theta_min          1.83 
_diffrn_reflns_theta_max          25.01 
_reflns_number_total              3574 
_reflns_number_gt                 2763 
_reflns_threshold_expression      >2sigma(I) 
 
_computing_data_collection      'Bruker APEX2'
_computing_cell_refinement      'Bruker SAINT'
_computing_data_reduction       'Bruker SAINT'  
_computing_structure_solution     'SHELXS-97 (Sheldrick, 1990)' 
_computing_structure_refinement   'SHELXL-97 (Sheldrick, 1997)' 
_computing_molecular_graphics   'Bruker SHELXTL'
_computing_publication_material 'Bruker SHELXTL'
 
_refine_special_details 
; 
 Refinement of F^2^ against ALL reflections.  The weighted R-factor wR and 
 goodness of fit S are based on F^2^, conventional R-factors R are based 
 on F, with F set to zero for negative F^2^. The threshold expression of 
 F^2^ > 2sigma(F^2^) is used only for calculating R-factors(gt) etc. and is 
 not relevant to the choice of reflections for refinement.  R-factors based 
 on F^2^ are statistically about twice as large as those based on F, and R- 
 factors based on ALL data will be even larger. 
; 
 
_refine_ls_structure_factor_coef  Fsqd  
_refine_ls_matrix_type            full 
_refine_ls_weighting_scheme       calc  
_refine_ls_weighting_details 
 'calc w=1/[\s^2^(Fo^2^)+(0.0781P)^2^+1.2325P] where P=(Fo^2^+2Fc^2^)/3' 
_atom_sites_solution_primary      direct 
_atom_sites_solution_secondary    difmap 
_atom_sites_solution_hydrogens    geom 
_refine_ls_hydrogen_treatment     mixed 
_refine_ls_extinction_method      none 
_refine_ls_extinction_coef        ? 
_refine_ls_number_reflns          3574 
_refine_ls_number_parameters      241 
_refine_ls_number_restraints      0 
_refine_ls_R_factor_all           0.0743 
_refine_ls_R_factor_gt            0.0571 
_refine_ls_wR_factor_ref          0.1680 
_refine_ls_wR_factor_gt           0.1531 
_refine_ls_goodness_of_fit_ref    1.052 
_refine_ls_restrained_S_all       1.052 
_refine_ls_shift/su_max           0.000 
_refine_ls_shift/su_mean          0.000 
 
loop_ 
 _atom_site_label 
 _atom_site_type_symbol 
 _atom_site_fract_x 
 _atom_site_fract_y 
 _atom_site_fract_z 
 _atom_site_U_iso_or_equiv 
 _atom_site_adp_type 
 _atom_site_occupancy 
 _atom_site_symmetry_multiplicity 
 _atom_site_calc_flag 
 _atom_site_refinement_flags 
 _atom_site_disorder_assembly 
 _atom_site_disorder_group 
C1 C -0.2198(8) 0.4099(2) 0.8122(4) 0.0961(15) Uani 1 1 d . . . 
C2 C -0.0447(9) 0.42017(19) 0.8516(3) 0.0994(16) Uani 1 1 d . . . 
H2 H -0.0053 0.4341 0.9164 0.119 Uiso 1 1 calc R . . 
C3 C 0.0755(6) 0.40879(17) 0.7901(2) 0.0758(10) Uani 1 1 d . . . 
H3 H 0.1960 0.4151 0.8141 0.091 Uiso 1 1 calc R . . 
C4 C 0.0113(4) 0.38822(14) 0.6944(2) 0.0540(8) Uani 1 1 d . . . 
C5 C -0.1697(5) 0.37992(17) 0.6602(3) 0.0694(9) Uani 1 1 d . . . 
H5 H -0.2130 0.3665 0.5955 0.083 Uiso 1 1 calc R . . 
C6 C -0.2864(6) 0.3909(2) 0.7194(3) 0.0883(12) Uani 1 1 d . . . 
H6 H -0.4073 0.3854 0.6958 0.106 Uiso 1 1 calc R . . 
C7 C 0.1331(4) 0.38382(14) 0.6255(2) 0.0511(7) Uani 1 1 d . . . 
C8 C 0.1776(5) 0.44774(17) 0.5896(3) 0.0724(10) Uani 1 1 d . . . 
H8 H 0.1351 0.4884 0.6128 0.087 Uiso 1 1 calc R . . 
C9 C 0.2818(6) 0.4543(2) 0.5212(3) 0.0845(12) Uani 1 1 d . . . 
H9 H 0.3073 0.4984 0.5000 0.101 Uiso 1 1 calc R . . 
C10 C 0.3460(5) 0.39637(18) 0.4856(2) 0.0707(10) Uani 1 1 d . . . 
H10 H 0.4154 0.4005 0.4397 0.085 Uiso 1 1 calc R . . 
C11 C 0.3073(4) 0.33060(16) 0.51819(19) 0.0518(7) Uani 1 1 d . . . 
C12 C 0.2023(3) 0.32401(14) 0.58909(18) 0.0440(6) Uani 1 1 d . . . 
C13 C 0.3511(4) 0.26218(16) 0.4914(2) 0.0580(8) Uani 1 1 d . . . 
H13 H 0.4185 0.2511 0.4463 0.070 Uiso 1 1 calc R . . 
C14 C 0.2775(4) 0.21666(17) 0.5429(2) 0.0603(8) Uani 1 1 d . . . 
H14 H 0.2871 0.1683 0.5387 0.072 Uiso 1 1 calc R . . 
C15 C 0.3311(4) 0.17177(17) 0.7743(2) 0.0620(8) Uani 1 1 d . . . 
C16 C 0.4628(6) 0.2323(3) 0.7873(4) 0.1203(19) Uani 1 1 d . . . 
H16A H 0.4171 0.2711 0.8175 0.180 Uiso 1 1 calc R . . 
H16B H 0.4809 0.2463 0.7244 0.180 Uiso 1 1 calc R . . 
H16C H 0.5730 0.2175 0.8280 0.180 Uiso 1 1 calc R . . 
C17 C 0.4112(6) 0.1071(2) 0.7331(3) 0.0974(14) Uani 1 1 d . . . 
H17A H 0.4381 0.1189 0.6714 0.146 Uiso 1 1 calc R . . 
H17B H 0.3277 0.0692 0.7240 0.146 Uiso 1 1 calc R . . 
H17C H 0.5174 0.0930 0.7784 0.146 Uiso 1 1 calc R . . 
C18 C 0.2945(5) 0.1508(2) 0.8736(2) 0.0775(10) Uani 1 1 d . . . 
H18A H 0.4037 0.1392 0.9180 0.116 Uiso 1 1 calc R . . 
H18B H 0.2174 0.1110 0.8652 0.116 Uiso 1 1 calc R . . 
H18C H 0.2396 0.1892 0.8996 0.116 Uiso 1 1 calc R . . 
C19 C -0.0386(4) 0.14031(17) 0.6374(2) 0.0611(8) Uani 1 1 d . . . 
C20 C 0.0104(7) 0.0899(3) 0.5653(4) 0.132(2) Uani 1 1 d . . . 
H20A H 0.1171 0.0658 0.5955 0.197 Uiso 1 1 calc R . . 
H20B H 0.0283 0.1152 0.5091 0.197 Uiso 1 1 calc R . . 
H20C H -0.0830 0.0565 0.5453 0.197 Uiso 1 1 calc R . . 
C21 C -0.0967(5) 0.09835(19) 0.7177(3) 0.0810(11) Uani 1 1 d . . . 
H21A H -0.1987 0.0708 0.6893 0.121 Uiso 1 1 calc R . . 
H21B H -0.1254 0.1299 0.7653 0.121 Uiso 1 1 calc R . . 
H21C H -0.0026 0.0680 0.7491 0.121 Uiso 1 1 calc R . . 
F1 F -0.3305(5) 0.42216(15) 0.8747(2) 0.1638(16) Uani 1 1 d . . . 
N1 N 0.1832(3) 0.25121(11) 0.60459(16) 0.0491(6) Uani 1 1 d . . . 
O1 O 0.0387(3) 0.25180(10) 0.75872(15) 0.0626(6) Uani 1 1 d . . . 
P1 P 0.12272(10) 0.20622(3) 0.69859(5) 0.0436(2) Uani 1 1 d . . . 
C22 C -0.1991(6) 0.1852(3) 0.5857(4) 0.1129(16) Uani 1 1 d . . . 
H22A H -0.1711 0.2090 0.5307 0.169 Uiso 1 1 calc R . . 
H22B H -0.2258 0.2190 0.6310 0.169 Uiso 1 1 calc R . . 
H22C H -0.2995 0.1554 0.5636 0.169 Uiso 1 1 calc R . . 
 
loop_ 
 _atom_site_aniso_label 
 _atom_site_aniso_U_11 
 _atom_site_aniso_U_22 
 _atom_site_aniso_U_33 
 _atom_site_aniso_U_23 
 _atom_site_aniso_U_13 
 _atom_site_aniso_U_12 
C1 0.148(4) 0.067(2) 0.098(3) 0.026(2) 0.078(3) 0.038(3) 
C2 0.193(5) 0.059(2) 0.056(2) 0.0033(17) 0.051(3) 0.019(3) 
C3 0.117(3) 0.0559(19) 0.0566(19) -0.0031(15) 0.0230(19) 0.0074(19) 
C4 0.079(2) 0.0363(14) 0.0517(16) 0.0035(12) 0.0257(15) 0.0069(13) 
C5 0.077(3) 0.067(2) 0.073(2) 0.0099(17) 0.0352(19) 0.0095(17) 
C6 0.096(3) 0.081(3) 0.104(3) 0.029(2) 0.058(3) 0.022(2) 
C7 0.0593(18) 0.0476(15) 0.0485(15) 0.0008(12) 0.0166(13) -0.0028(13) 
C8 0.099(3) 0.0478(17) 0.080(2) -0.0017(16) 0.039(2) -0.0096(17) 
C9 0.110(3) 0.059(2) 0.096(3) 0.0096(19) 0.049(2) -0.020(2) 
C10 0.076(2) 0.079(2) 0.067(2) 0.0080(17) 0.0360(18) -0.0181(18) 
C11 0.0489(17) 0.0640(18) 0.0441(14) 0.0042(13) 0.0136(12) -0.0040(13) 
C12 0.0439(15) 0.0478(15) 0.0403(13) 0.0036(11) 0.0095(11) -0.0020(11) 
C13 0.0577(19) 0.0713(19) 0.0507(16) 0.0018(14) 0.0242(14) 0.0075(15) 
C14 0.076(2) 0.0569(18) 0.0570(17) 0.0005(14) 0.0342(16) 0.0113(15) 
C15 0.0547(19) 0.069(2) 0.0603(18) 0.0178(15) 0.0076(15) -0.0008(15) 
C16 0.094(3) 0.128(4) 0.117(4) 0.039(3) -0.024(3) -0.045(3) 
C17 0.087(3) 0.120(3) 0.094(3) 0.034(3) 0.037(2) 0.052(3) 
C18 0.093(3) 0.086(2) 0.0525(18) 0.0154(17) 0.0155(18) 0.019(2) 
C19 0.061(2) 0.0644(19) 0.0601(18) -0.0058(15) 0.0195(15) -0.0102(15) 
C20 0.143(4) 0.141(4) 0.136(4) -0.089(4) 0.085(4) -0.073(4) 
C21 0.085(3) 0.072(2) 0.094(3) -0.005(2) 0.038(2) -0.0253(19) 
F1 0.259(4) 0.124(2) 0.168(3) 0.048(2) 0.173(3) 0.078(2) 
N1 0.0614(15) 0.0452(13) 0.0473(13) 0.0030(10) 0.0263(11) 0.0054(10) 
O1 0.0926(16) 0.0460(11) 0.0610(12) 0.0045(9) 0.0421(12) 0.0131(10) 
P1 0.0517(4) 0.0401(4) 0.0431(4) 0.0019(3) 0.0190(3) 0.0033(3) 
C22 0.074(3) 0.126(4) 0.121(4) 0.021(3) -0.014(3) -0.017(3) 
 
_geom_special_details 
; 
 All esds (except the esd in the dihedral angle between two l.s. planes) 
 are estimated using the full covariance matrix.  The cell esds are taken 
 into account individually in the estimation of esds in distances, angles 
 and torsion angles; correlations between esds in cell parameters are only 
 used when they are defined by crystal symmetry.  An approximate (isotropic) 
 treatment of cell esds is used for estimating esds involving l.s. planes. 
; 
 
loop_ 
 _geom_bond_atom_site_label_1 
 _geom_bond_atom_site_label_2 
 _geom_bond_distance 
 _geom_bond_site_symmetry_2 
 _geom_bond_publ_flag 
C1 C6 1.337(7) . ? 
C1 C2 1.364(7) . ? 
C1 F1 1.377(4) . ? 
C2 C3 1.421(6) . ? 
C2 H2 0.9300 . ? 
C3 C4 1.379(5) . ? 
C3 H3 0.9300 . ? 
C4 C5 1.390(5) . ? 
C4 C7 1.498(4) . ? 
C5 C6 1.374(5) . ? 
C5 H5 0.9300 . ? 
C6 H6 0.9300 . ? 
C7 C8 1.392(4) . ? 
C7 C12 1.406(4) . ? 
C8 C9 1.391(5) . ? 
C8 H8 0.9300 . ? 
C9 C10 1.354(5) . ? 
C9 H9 0.9300 . ? 
C10 C11 1.392(4) . ? 
C10 H10 0.9300 . ? 
C11 C13 1.422(4) . ? 
C11 C12 1.424(4) . ? 
C12 N1 1.420(3) . ? 
C13 C14 1.337(4) . ? 
C13 H13 0.9300 . ? 
C14 N1 1.414(3) . ? 
C14 H14 0.9300 . ? 
C15 C16 1.528(5) . ? 
C15 C18 1.533(4) . ? 
C15 C17 1.552(5) . ? 
C15 P1 1.848(3) . ? 
C16 H16A 0.9600 . ? 
C16 H16B 0.9600 . ? 
C16 H16C 0.9600 . ? 
C17 H17A 0.9600 . ? 
C17 H17B 0.9600 . ? 
C17 H17C 0.9600 . ? 
C18 H18A 0.9600 . ? 
C18 H18B 0.9600 . ? 
C18 H18C 0.9600 . ? 
C19 C20 1.504(5) . ? 
C19 C21 1.529(4) . ? 
C19 C22 1.553(5) . ? 
C19 P1 1.847(3) . ? 
C20 H20A 0.9600 . ? 
C20 H20B 0.9600 . ? 
C20 H20C 0.9600 . ? 
C21 H21A 0.9600 . ? 
C21 H21B 0.9600 . ? 
C21 H21C 0.9600 . ? 
N1 P1 1.723(2) . ? 
O1 P1 1.4620(19) . ? 
C22 H22A 0.9600 . ? 
C22 H22B 0.9600 . ? 
C22 H22C 0.9600 . ? 
 
loop_ 
 _geom_angle_atom_site_label_1 
 _geom_angle_atom_site_label_2 
 _geom_angle_atom_site_label_3 
 _geom_angle 
 _geom_angle_site_symmetry_1 
 _geom_angle_site_symmetry_3 
 _geom_angle_publ_flag 
C6 C1 C2 124.6(4) . . ? 
C6 C1 F1 120.2(5) . . ? 
C2 C1 F1 115.2(5) . . ? 
C1 C2 C3 117.7(4) . . ? 
C1 C2 H2 121.2 . . ? 
C3 C2 H2 121.2 . . ? 
C4 C3 C2 119.2(4) . . ? 
C4 C3 H3 120.4 . . ? 
C2 C3 H3 120.4 . . ? 
C3 C4 C5 119.1(3) . . ? 
C3 C4 C7 119.9(3) . . ? 
C5 C4 C7 120.5(3) . . ? 
C6 C5 C4 121.8(4) . . ? 
C6 C5 H5 119.1 . . ? 
C4 C5 H5 119.1 . . ? 
C1 C6 C5 117.6(5) . . ? 
C1 C6 H6 121.2 . . ? 
C5 C6 H6 121.2 . . ? 
C8 C7 C12 115.9(3) . . ? 
C8 C7 C4 115.2(3) . . ? 
C12 C7 C4 128.8(2) . . ? 
C9 C8 C7 123.8(3) . . ? 
C9 C8 H8 118.1 . . ? 
C7 C8 H8 118.1 . . ? 
C10 C9 C8 119.9(3) . . ? 
C10 C9 H9 120.0 . . ? 
C8 C9 H9 120.0 . . ? 
C9 C10 C11 119.5(3) . . ? 
C9 C10 H10 120.2 . . ? 
C11 C10 H10 120.2 . . ? 
C10 C11 C13 131.4(3) . . ? 
C10 C11 C12 120.5(3) . . ? 
C13 C11 C12 108.1(2) . . ? 
C7 C12 N1 132.8(2) . . ? 
C7 C12 C11 120.4(2) . . ? 
N1 C12 C11 106.8(2) . . ? 
C14 C13 C11 107.4(2) . . ? 
C14 C13 H13 126.3 . . ? 
C11 C13 H13 126.3 . . ? 
C13 C14 N1 111.6(3) . . ? 
C13 C14 H14 124.2 . . ? 
N1 C14 H14 124.2 . . ? 
C16 C15 C18 110.1(3) . . ? 
C16 C15 C17 109.5(3) . . ? 
C18 C15 C17 107.5(3) . . ? 
C16 C15 P1 106.1(3) . . ? 
C18 C15 P1 107.3(2) . . ? 
C17 C15 P1 116.3(3) . . ? 
C15 C16 H16A 109.5 . . ? 
C15 C16 H16B 109.5 . . ? 
H16A C16 H16B 109.5 . . ? 
C15 C16 H16C 109.5 . . ? 
H16A C16 H16C 109.5 . . ? 
H16B C16 H16C 109.5 . . ? 
C15 C17 H17A 109.5 . . ? 
C15 C17 H17B 109.5 . . ? 
H17A C17 H17B 109.5 . . ? 
C15 C17 H17C 109.5 . . ? 
H17A C17 H17C 109.5 . . ? 
H17B C17 H17C 109.5 . . ? 
C15 C18 H18A 109.5 . . ? 
C15 C18 H18B 109.5 . . ? 
H18A C18 H18B 109.5 . . ? 
C15 C18 H18C 109.5 . . ? 
H18A C18 H18C 109.5 . . ? 
H18B C18 H18C 109.5 . . ? 
C20 C19 C21 108.6(3) . . ? 
C20 C19 C22 109.8(4) . . ? 
C21 C19 C22 107.1(3) . . ? 
C20 C19 P1 120.1(3) . . ? 
C21 C19 P1 107.3(2) . . ? 
C22 C19 P1 103.4(3) . . ? 
C19 C20 H20A 109.5 . . ? 
C19 C20 H20B 109.5 . . ? 
H20A C20 H20B 109.5 . . ? 
C19 C20 H20C 109.5 . . ? 
H20A C20 H20C 109.5 . . ? 
H20B C20 H20C 109.5 . . ? 
C19 C21 H21A 109.5 . . ? 
C19 C21 H21B 109.5 . . ? 
H21A C21 H21B 109.5 . . ? 
C19 C21 H21C 109.5 . . ? 
H21A C21 H21C 109.5 . . ? 
H21B C21 H21C 109.5 . . ? 
C14 N1 C12 106.1(2) . . ? 
C14 N1 P1 120.04(19) . . ? 
C12 N1 P1 131.35(18) . . ? 
O1 P1 N1 112.07(12) . . ? 
O1 P1 C15 109.16(15) . . ? 
N1 P1 C15 105.21(13) . . ? 
O1 P1 C19 109.23(14) . . ? 
N1 P1 C19 104.94(13) . . ? 
C15 P1 C19 116.17(16) . . ? 
C19 C22 H22A 109.5 . . ? 
C19 C22 H22B 109.5 . . ? 
H22A C22 H22B 109.5 . . ? 
C19 C22 H22C 109.5 . . ? 
H22A C22 H22C 109.5 . . ? 
H22B C22 H22C 109.5 . . ? 
 
loop_ 
 _geom_torsion_atom_site_label_1 
 _geom_torsion_atom_site_label_2 
 _geom_torsion_atom_site_label_3 
 _geom_torsion_atom_site_label_4 
 _geom_torsion 
 _geom_torsion_site_symmetry_1 
 _geom_torsion_site_symmetry_2 
 _geom_torsion_site_symmetry_3 
 _geom_torsion_site_symmetry_4 
 _geom_torsion_publ_flag 
C6 C1 C2 C3 -1.0(6) . . . . ? 
F1 C1 C2 C3 -179.5(3) . . . . ? 
C1 C2 C3 C4 0.1(5) . . . . ? 
C2 C3 C4 C5 0.7(5) . . . . ? 
C2 C3 C4 C7 173.1(3) . . . . ? 
C3 C4 C5 C6 -0.7(5) . . . . ? 
C7 C4 C5 C6 -173.0(3) . . . . ? 
C2 C1 C6 C5 1.1(6) . . . . ? 
F1 C1 C6 C5 179.5(3) . . . . ? 
C4 C5 C6 C1 -0.2(5) . . . . ? 
C3 C4 C7 C8 -76.9(4) . . . . ? 
C5 C4 C7 C8 95.4(4) . . . . ? 
C3 C4 C7 C12 106.0(4) . . . . ? 
C5 C4 C7 C12 -81.7(4) . . . . ? 
C12 C7 C8 C9 0.8(5) . . . . ? 
C4 C7 C8 C9 -176.7(4) . . . . ? 
C7 C8 C9 C10 0.1(6) . . . . ? 
C8 C9 C10 C11 -0.2(6) . . . . ? 
C9 C10 C11 C13 177.6(4) . . . . ? 
C9 C10 C11 C12 -0.5(5) . . . . ? 
C8 C7 C12 N1 -177.6(3) . . . . ? 
C4 C7 C12 N1 -0.5(5) . . . . ? 
C8 C7 C12 C11 -1.5(4) . . . . ? 
C4 C7 C12 C11 175.6(3) . . . . ? 
C10 C11 C12 C7 1.4(4) . . . . ? 
C13 C11 C12 C7 -177.1(3) . . . . ? 
C10 C11 C12 N1 178.4(3) . . . . ? 
C13 C11 C12 N1 -0.1(3) . . . . ? 
C10 C11 C13 C14 -178.3(3) . . . . ? 
C12 C11 C13 C14 -0.1(3) . . . . ? 
C11 C13 C14 N1 0.2(4) . . . . ? 
C13 C14 N1 C12 -0.2(3) . . . . ? 
C13 C14 N1 P1 -164.3(2) . . . . ? 
C7 C12 N1 C14 176.6(3) . . . . ? 
C11 C12 N1 C14 0.2(3) . . . . ? 
C7 C12 N1 P1 -21.8(5) . . . . ? 
C11 C12 N1 P1 161.7(2) . . . . ? 
C14 N1 P1 O1 175.6(2) . . . . ? 
C12 N1 P1 O1 16.2(3) . . . . ? 
C14 N1 P1 C15 57.1(3) . . . . ? 
C12 N1 P1 C15 -102.4(3) . . . . ? 
C14 N1 P1 C19 -66.0(3) . . . . ? 
C12 N1 P1 C19 134.6(3) . . . . ? 
C16 C15 P1 O1 -74.8(3) . . . . ? 
C18 C15 P1 O1 42.9(3) . . . . ? 
C17 C15 P1 O1 163.2(2) . . . . ? 
C16 C15 P1 N1 45.6(3) . . . . ? 
C18 C15 P1 N1 163.3(2) . . . . ? 
C17 C15 P1 N1 -76.4(3) . . . . ? 
C16 C15 P1 C19 161.2(3) . . . . ? 
C18 C15 P1 C19 -81.1(3) . . . . ? 
C17 C15 P1 C19 39.2(3) . . . . ? 
C20 C19 P1 O1 175.7(3) . . . . ? 
C21 C19 P1 O1 -59.9(3) . . . . ? 
C22 C19 P1 O1 53.1(3) . . . . ? 
C20 C19 P1 N1 55.4(4) . . . . ? 
C21 C19 P1 N1 179.8(2) . . . . ? 
C22 C19 P1 N1 -67.3(3) . . . . ? 
C20 C19 P1 C15 -60.4(4) . . . . ? 
C21 C19 P1 C15 64.1(3) . . . . ? 
C22 C19 P1 C15 177.0(2) . . . . ? 
 
_diffrn_measured_fraction_theta_max    0.999 
_diffrn_reflns_theta_full              25.01 
_diffrn_measured_fraction_theta_full   0.999 
_refine_diff_density_max    0.371 
_refine_diff_density_min   -0.344 
_refine_diff_density_rms    0.044 
